# Supplementary material
Source: Springer Nature journal article supplement (https://www.springermedizin.de/resource/supplementary/13643_2012_94_MOESM5_ESM.pdf/9681474)
Supplement: MOESM5 [file 9681474]

**Literature Search**

Potentially relevant citations retrieved for screening: n=5792

- Medline
- EMBASE
- AARP Ageline
- AMED
- Cochrane Library
- DARE
- Rx for Change
- Health Systems Evidence
- Google

**Screening**

Excluded: n=5488

- No or inappropriate intervention
- Inappropriate population
- Inappropriate outcome
- Duplicate review
- Not a systematic review

Included for full-text review  
n=304

**Quality**

Excluded: n=179

- No or inappropriate intervention
- Inappropriate population
- Inappropriate outcome
- Duplicate review
- Not a systematic review
- Low relevance

Included for AMSTAR:  
n=125

**Analysis**

Excluded: n=75

- AMSTAR  $\leq$  4

Included in final analysis:  
n=50  
(in 54 citations\*)
